# Supplementary material for: Buffering of transcription rate by mRNA half-life is a conserved feature of Rett syndrome models
Source: PubMed Central journal article supplement (PMC10076348; doi:10.1038/s41467-023-37339-6), 2023-04-05
Supplement: 41467_2023_37339_MOESM1_ESM.pdf [file 41467_2023_37339_MOESM1_ESM.pdf]

**Supplementary Information for:**

**Buffering of transcription rate by mRNA half-life is a conserved feature of Rett syndrome models.**

Deivid C. Rodrigues<sup>1</sup>, Marat Mufteev<sup>1,2</sup>, Kyoko E. Yuki<sup>3</sup>, Ashrut Narula<sup>2,4</sup>, Wei Wei<sup>1</sup>, Alina Piekna<sup>1</sup>, Jiajie Liu<sup>1</sup>, Peter Pasceri<sup>1</sup>, Olivia S. Rissland<sup>4,5</sup>, Michael D. Wilson<sup>2,3</sup>, and James Ellis<sup>1,2</sup>

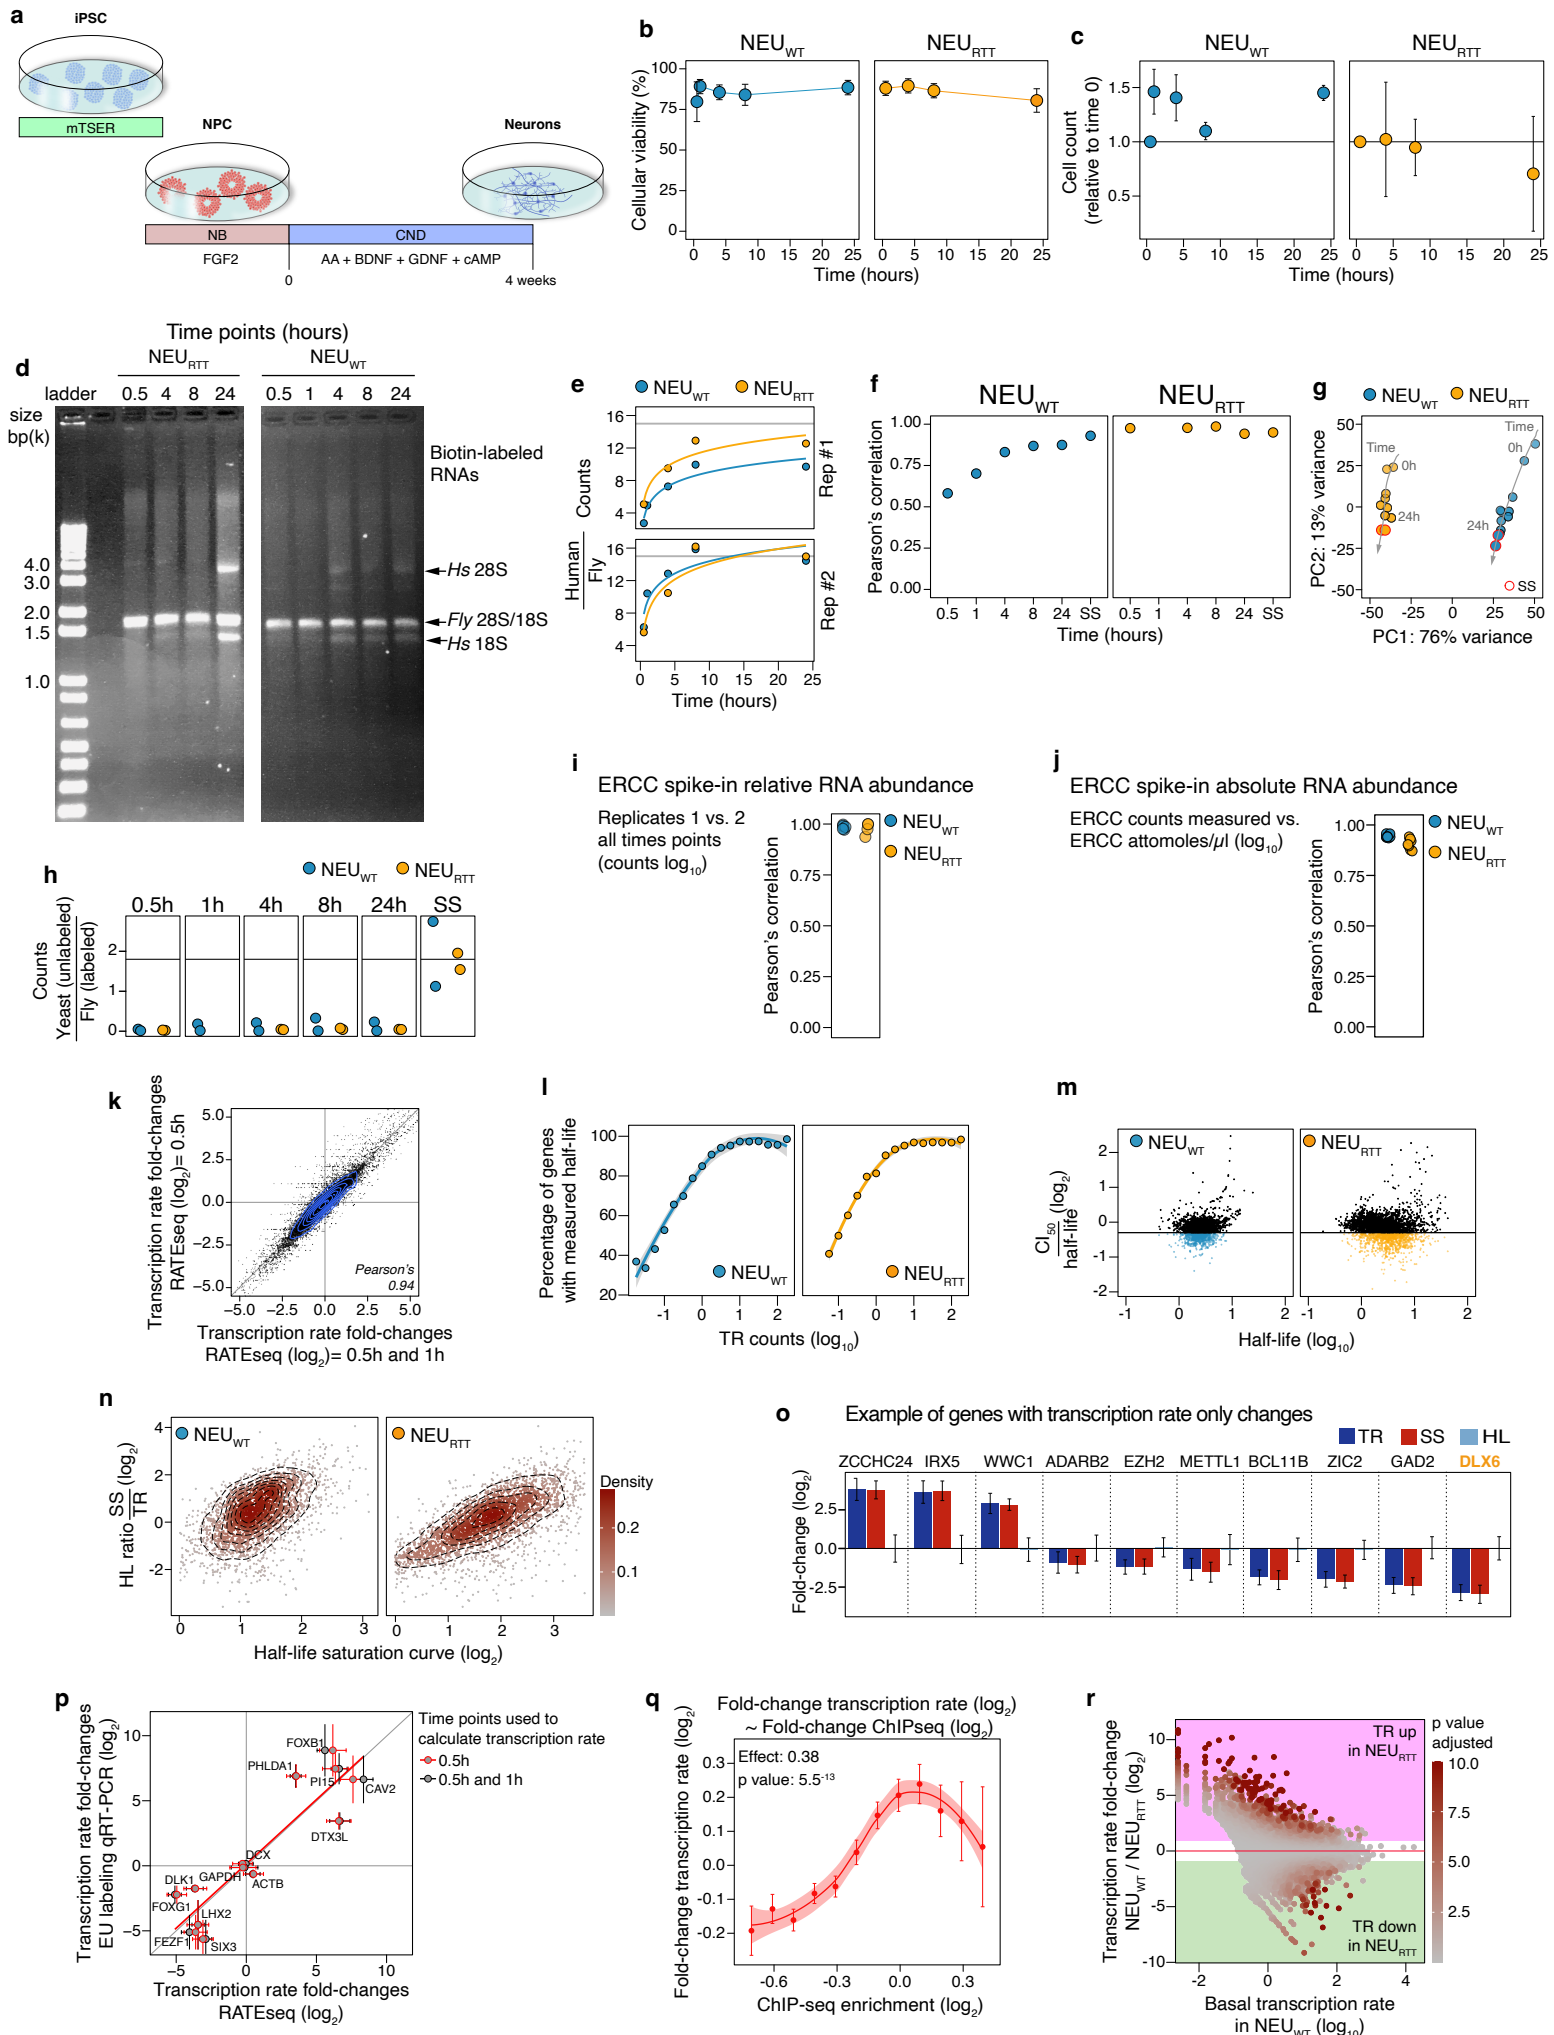

### Fig S1. Quality control of the RATE-seq experiment.

A, schematics of the cortical neuronal differentiation protocol including a neuronal enrichment step. B-C, 4sU does not impact neuronal viability (2 independent biological replicates). Error bars= standard deviation. D, representative agarose gel of 4sU-labeled pulled-down RNAs. We run independent gels for each biological replicate (n=2). E, 4sU incorporation kinetics of human mRNA normalized to fly spike-in RNA. F, Pearson's correlation between replicates and time-points of the human RNAs. G, principal component analysis of NEU<sub>WT</sub> and NEU<sub>RTT</sub> data showing significant separation between genotypes and time-points. Steady-state samples= red outline and cluster with the 24-hour time-point samples. H, spike-in RNA read counts: unlabeled yeast vs. fly RNA for all time-points. Unlabeled yeast RNA spike-in RNA was used as pull-down negative control. The absence of yeast RNA indicates that the pull-down of 4sU labeled RNAs had minimal contamination of unlabeled human RNAs, but readily detectable in the steady-state samples. I-J, Pearson's correlation of ERCC spike-in RNAs between replicates and spike-in concentration. ERCC spike-in RNA was used as a control for library quality. High Pearson's correlations indicate the quality of the library samples. K, transcription rates measured using only 0.5-hour or 0.5 and 1-hour time-points were highly correlated. L-N, half-life measured with 4sU saturation curve method. (L) percentage of genes with measured half-life depending on transcription rate. Error bars= 95% CI, loess fit. M, the accuracy of half-life shown against half-life magnitude. CI<sub>50</sub>= 50% confidence interval. Black points denote genes with poorly fit saturation curves and removed from analysis in panel N. N, comparison of half-life estimated with two methods for well-measured genes. O, examples of transcription-mediated changes in steady-state (log<sub>2</sub> fold-change and SD bars output from DESeq2). DLX6= high autism-risk gene. P, transcription rate fold-changes measured using 0.5-hour or 0.5- and 1-hour time-points orthogonally validated by 5EU-labeling method. Q, genes with the highest transcription rate fold-change are enriched for MECP2-binding<sup>9</sup>. R, genes with the highest transcription rate increase in NEU<sub>RTT</sub> had the lowest basal transcription rate in NEU<sub>WT</sub> neurons<sup>17</sup>. TR= transcription rate, HL= half-life, SS= steady-state. Transcription rates derived from 4 (O and Q) or 2 (P) biological replicates. Error bars= 95% CI. Panel A was created with [BioRender.com](https://BioRender.com).

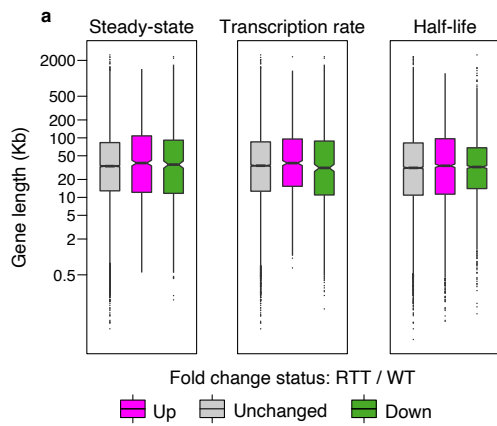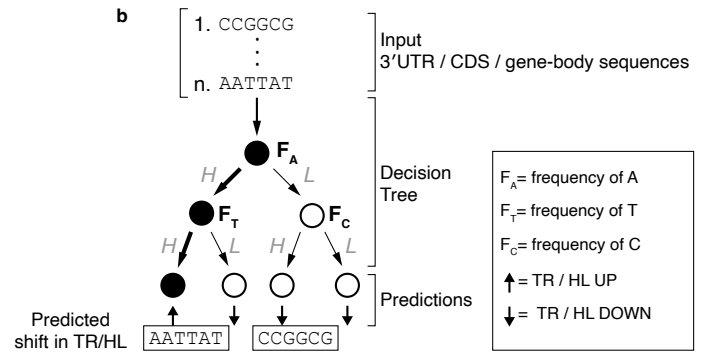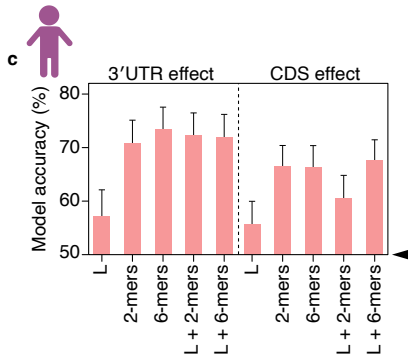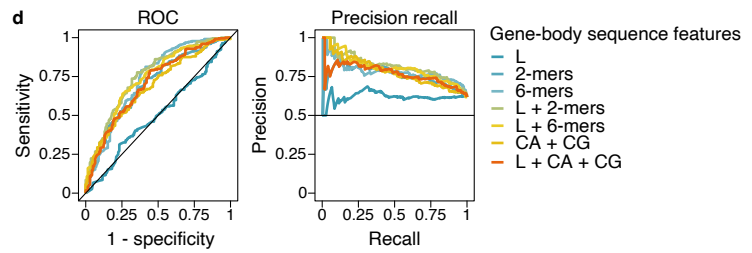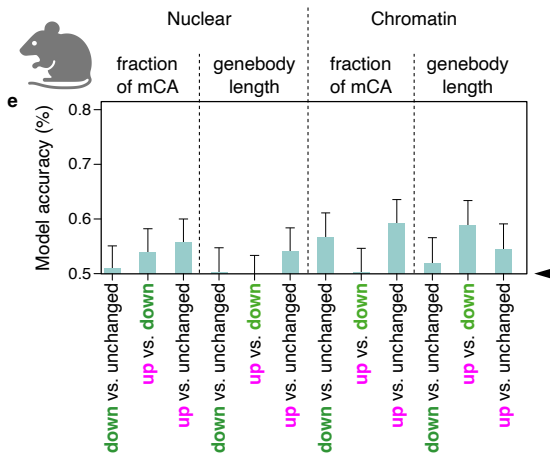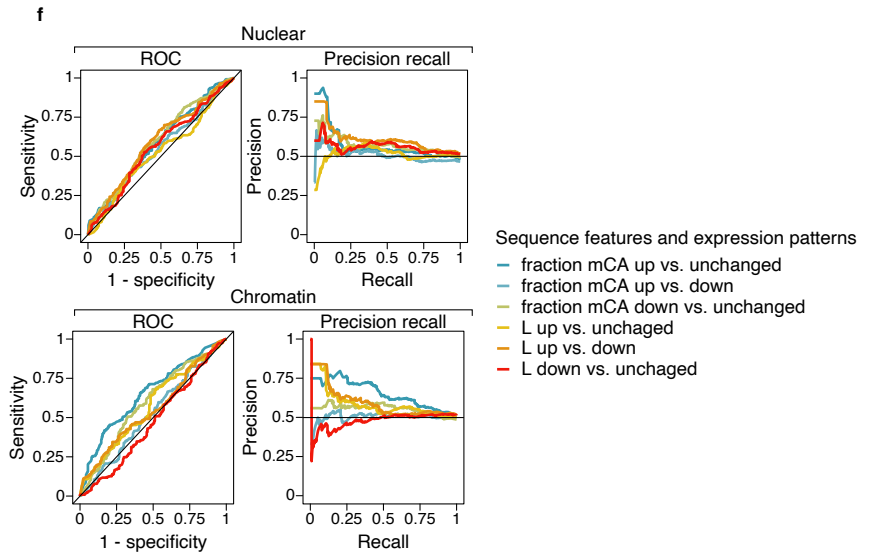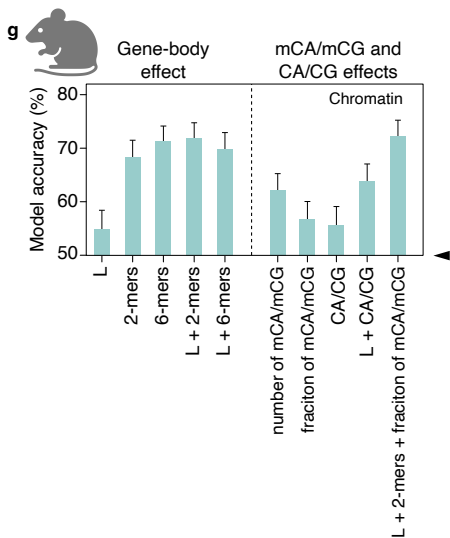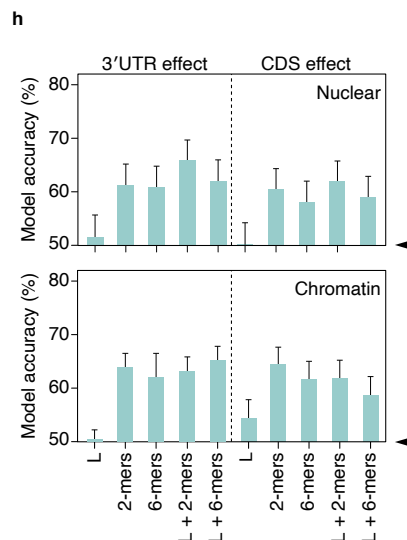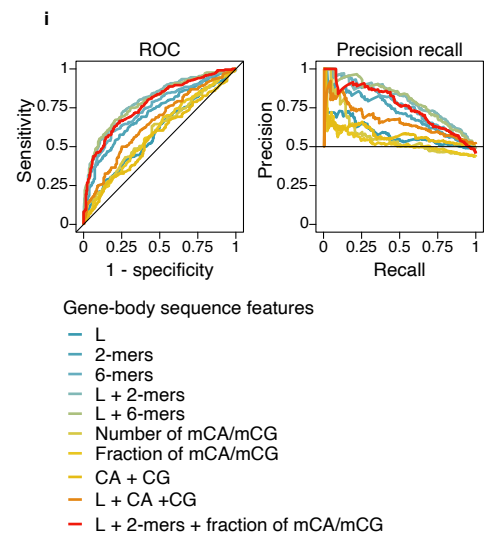

**Figure S2. Classifier model to predict DNA sequence features affecting transcription rate in the absence of *MECP2*.**

A, gene length is not associated with changes in steady-state, transcription rate, or half-life in NEU<sub>RTT</sub> as seen for adult mice<sup>9</sup> (steady-state and half-life= 2 biological replicates, transcription rate= 4 biological replicates). Up and low hinges= 25<sup>th</sup> and 75<sup>th</sup> percentiles. Up and low whiskers= 1.5 \*IQR (inter-quartile range) above and below the corresponding hinges. Notches are 1.58 \* IQR/sqrt(n), which matches 95% CI for median comparison. B, schematic representation of the classifier decision tree utilized. A collection of decision trees forms the random forest model. C, 3'UTR or CDS mRNA sequence features-based random forest classifier for prediction of transcription rate fold-change in NEU<sub>RTT</sub>. D, receiver operating characteristic curve (ROC) and precision-recall curve (PRC) showing overall performance of the classifier for prediction of human transcription rate fold-changes. E, predictive model for transcription rate fold-changes in the mice using either nuclear or chromatin-associated RNA samples. While the fraction of mCA and gene-body length offer some accuracy to distinguish transcription rate up versus unchanged or up versus down in some cases, the classifier found that other sequence features offer higher prediction accuracies (see also figure 2C). Error bars= 95% CI. F, ROC and PRC showing overall performance of the classifier for prediction of mouse transcription rate fold-change relative to panel E. G, gene-body or number and frequencies of mCA/mCG mRNA sequence features-based random forest classifier for prediction of transcription rate fold-changes in the mouse *Mecp2* *y*<sup>-/-</sup>. Error bars= 95% CI. H, 3'UTR or CDS mRNA sequence features-based random forest classifier for prediction of transcription rate fold-changes in the mouse RTT model. Error bars= 95% CI. I, ROC and PRC show the overall performance of the classifier for predicting mouse transcription rate fold-change based on the nuclear dataset. TR= transcription rate, HL= half-life, SS= steady-state. For panels C, E, G, and H, error bars= 95% CI, and are estimated from approximately 400 genes for human and 500 for mice. Log<sub>2</sub> fold-change for each gene is derived from 4 independent replicates (30 minutes and 1h) for human and 10 replicates for mice. Panels C, E, and G were created with [BioRender.com](https://BioRender.com).

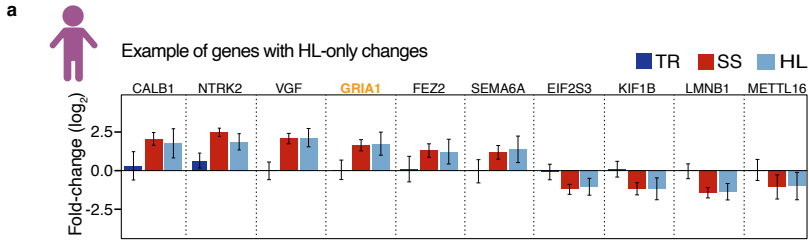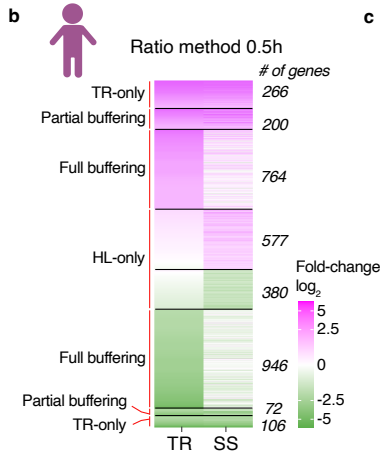

**c**

| Class                       | # 30 min    | # 30 min + 1h | # Overlap  | Percentage overlap | # 30 min unique | # 30 min + 1h unique | # Union      | # Total       | Fisher p value            |
|-----------------------------|-------------|---------------|------------|--------------------|-----------------|----------------------|--------------|---------------|---------------------------|
| TR-only (TR up)             | 266         | 299           | 190        | 71                 | 76              | 109                  | 375          | 15,000        | 3.3 <sup>290</sup>        |
| Partial buffering (TR up)   | 200         | 211           | 106        | 53                 | 94              | 105                  | 305          | 15,000        | 2.10 <sup>152</sup>       |
| Full buffering (TR up)      | 764         | 434           | 146        | 34                 | 618             | 288                  | 1,052        | 15,000        | 5.50 <sup>82</sup>        |
| HL-only (SS up)             | 577         | 533           | 461        | 86                 | 116             | 72                   | 649          | 15,000        | 0.0 <sup>00</sup>         |
| HL-only (SS down)           | 380         | 326           | 294        | 90                 | 86              | 32                   | 412          | 15,000        | 0.0 <sup>00</sup>         |
| Full buffering (TR down)    | 946         | 355           | 127        | 36                 | 819             | 288                  | 1,174        | 15,000        | 3.40 <sup>63</sup>        |
| Partial buffering (TR down) | 72          | 87            | 43         | 60                 | 29              | 44                   | 116          | 15,000        | 2.40 <sup>82</sup>        |
| TR only (TR down)           | 106         | 145           | 82         | 77                 | 24              | 63                   | 169          | 15,000        | 6.50 <sup>155</sup>       |
| <b>All buffered genes</b>   | <b>1982</b> | <b>1087</b>   | <b>422</b> | <b>39</b>          | <b>1,560</b>    | <b>665</b>           | <b>2,647</b> | <b>15,000</b> | <b>9.2<sup>-110</sup></b> |

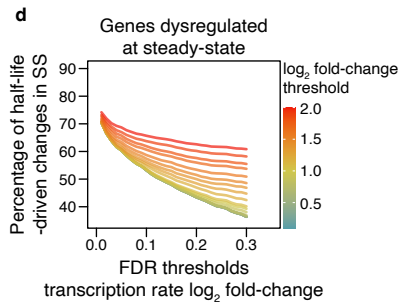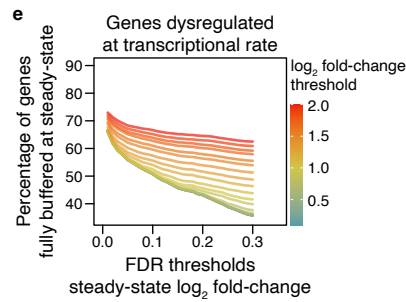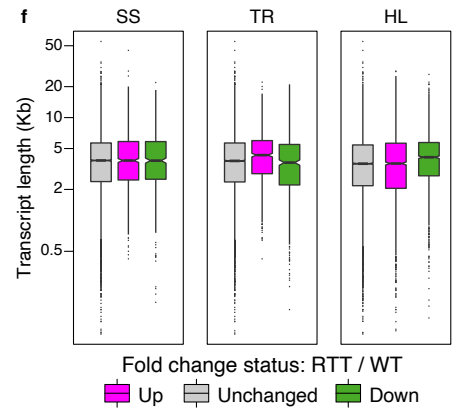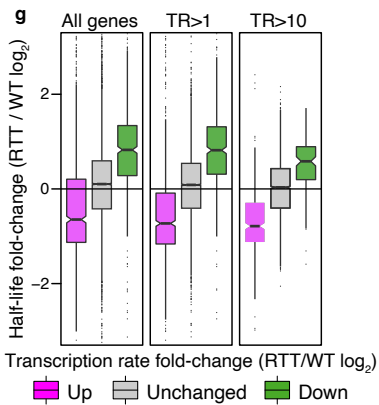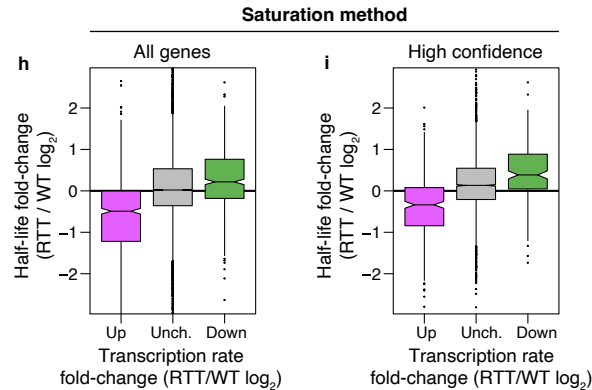

**Figure S3. Human RTT neurons show half-life changes in steady-state mRNA levels.**

A, DESeq2 outputs ( $\log_2$ ) of genes with mRNA half-life only changes, causing changes in the steady-state independent of transcription rate (derived from 2 biological replicates). GRIA1 is known to confer a high risk for autism when mutated. Standard error bars are also output from DESeq2. B, number of genes with changes in transcription rate only (TR-only), partially or fully buffered by half-life changes, and genes whose change in steady-state are caused by altered half-life only (HL-only). These calculations were made using the 0.5h time-point for both cell types, and the figure only shows genes whose transcription rates were altered by at least 4-fold. C, percentage of genes with no significant transcription rate shift or HL-only changes in steady-state (y-axis) as a function of the FDR (x-axis) and fold-change (color) thresholds. D, percentage of genes with no significant steady-state shift or fully buffered by mRNA stability mechanisms (y-axis) as a function of the FDR (x-axis) and fold-change (color) thresholds. E, human genes with steady-state, transcription rate, or half-life fold-changes in NEU<sub>RTT</sub> do not show significant enrichment for transcript length as seen for adult mice<sup>9</sup>. F, the buffering of transcription rate is observed independently of the underlying abundance levels of measured transcripts. This indicates that most genes transcriptionally dysregulated are buffered by half-life changes independent of their abundances. G-H, the buffering effect is also present when half-life was calculated using the saturation method including all genes (H, low and high standard error bars) or just genes with low standard error bars (I, high confidence). 2 biological replicates for steady-state and half-life, and 4 biological replicates for transcription rate measurements. The transcriptional level changes for each gene are derived from data represented in Figure 3H-I. For F-I, up and low hinges are 25<sup>th</sup> and 75<sup>th</sup> percentiles. Up and low whiskers are  $1.5 * \text{IQR}$  (inter-quartile range) above and below the corresponding hinges. Notches are  $1.58 * \text{IQR} / \sqrt{n}$  which matches 95% CI for median comparison. Panels A and B were created with [BioRender.com](https://BioRender.com).

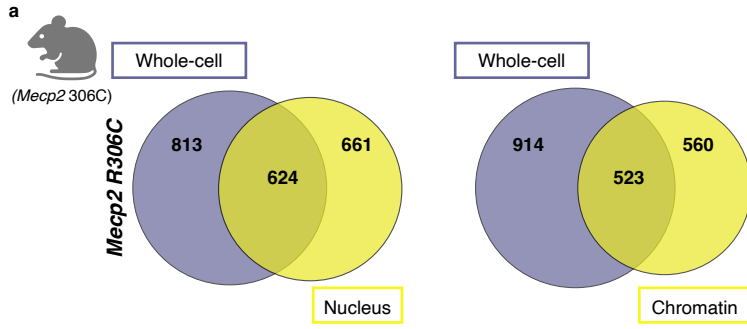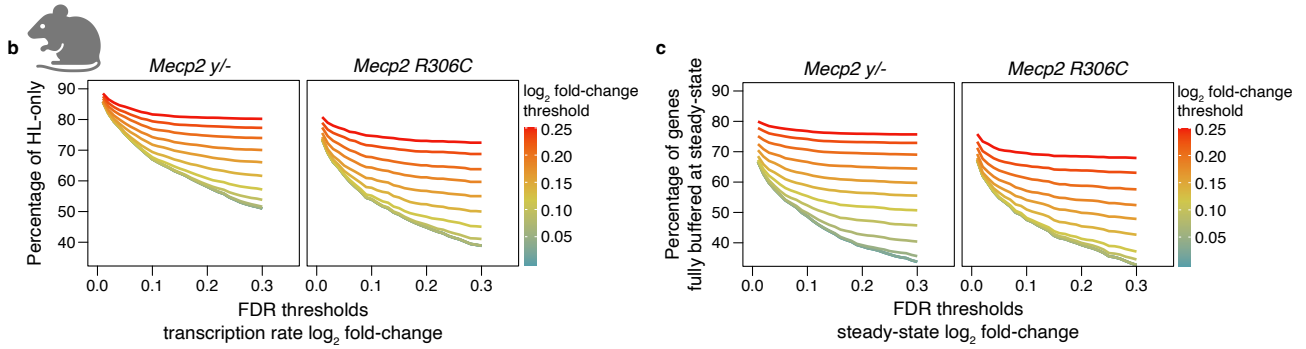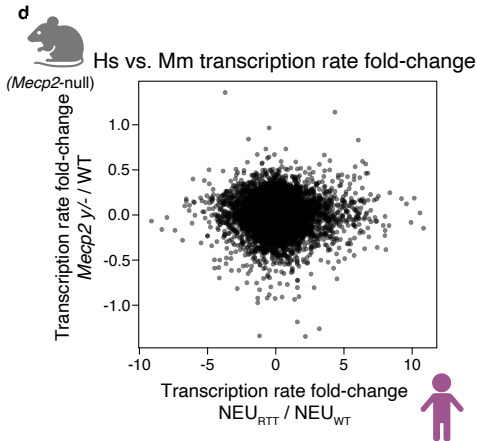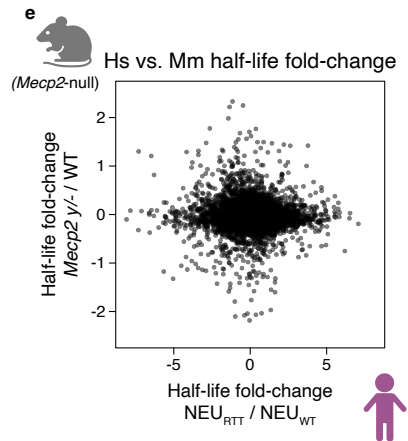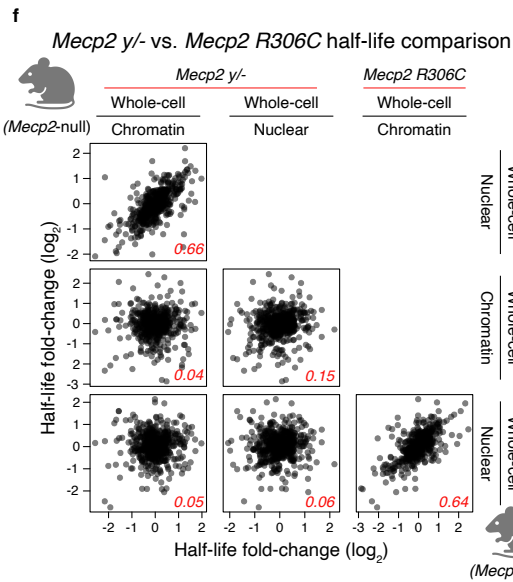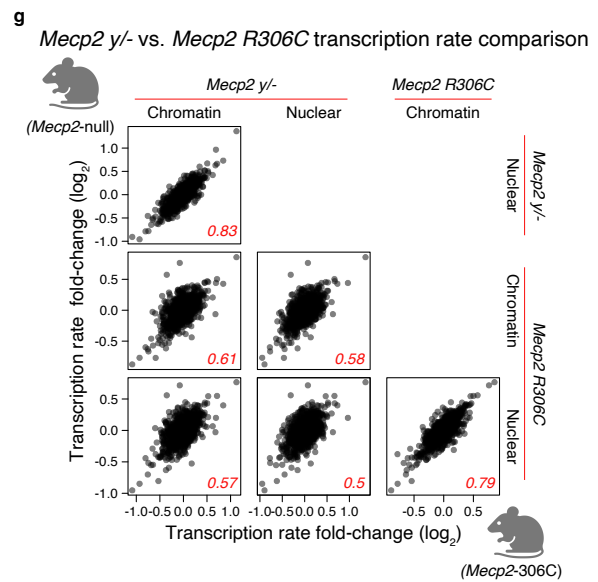



**Figure S4. Mouse RTT models corroborate the human data and show half-life changes in steady-state mRNA levels.**

A, the overlap of genes altered at transcription rate based on nuclear (left panel) or chromatin-associated RNA (right panel) and steady-state (whole-cell) in the *Mecp2 R306C* mouse neurons. B, percentage of genes with no significant steady-state shift or fully buffered by half-life (y-axis) as a function of the FDR (x-axis) and fold-change (color) thresholds in the *Mecp2 y/-* and *Mecp2 R306C* mice. C, percentage of genes with no significant transcription rate shift or with half-life change (y-axis) as a function of the FDR (x-axis) and fold-change (color) thresholds in the *Mecp2 y/-* and *Mecp2 R306C* mice. D-E comparison of the fold-changes between genes in human (Hs) and mouse (Mm) RTT models showing limited agreement in the identity of genes with altered transcription rate (D) and half-life (E) between species. F-G, the identity of genes differentially regulated at half-life and transcription rate is also limited when comparing the *Mecp2 y/-* and *Mecp2 R306C* mouse models. Pearson correlations for each comparison are depicted inside boxes in red fonts. TR= transcription rate, HL= half-life, SS= steady-state. Panels A to G were created with [BioRender.com](https://www.biorender.com).

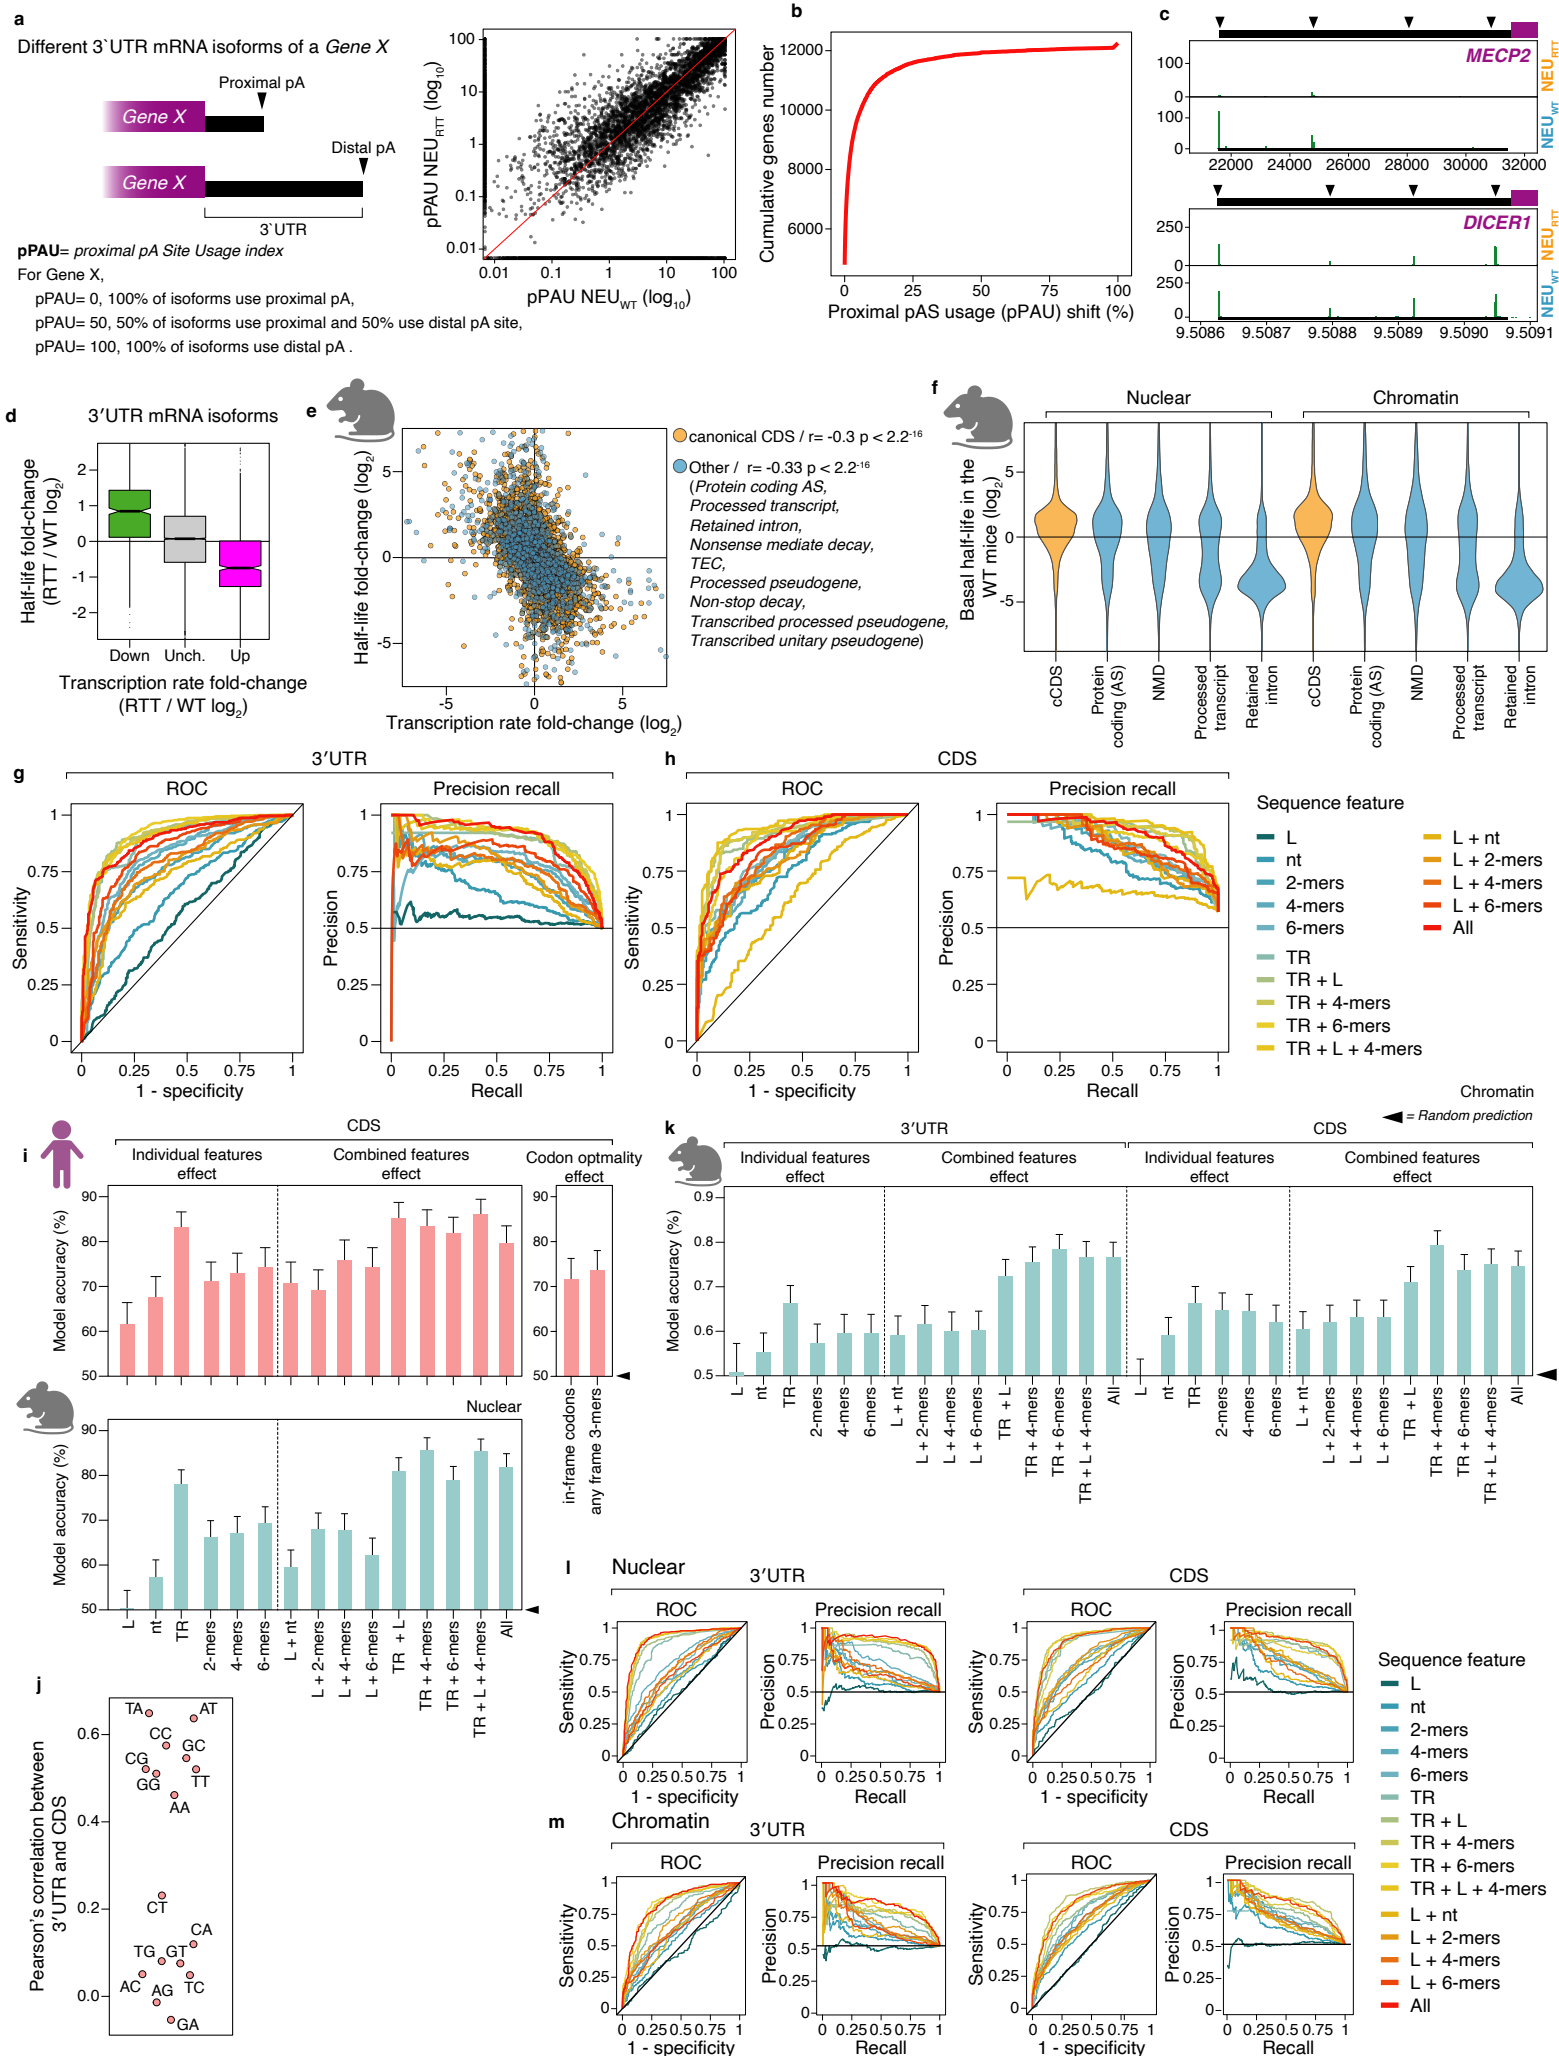

**Figure S5. Quantification of 3'UTR and alternatively-spliced isoforms in humans and mice, and predictive models of half-life changes in mice.**

A, Proximal poly-Adenylation site usage index (pPAU) is the percentage of mRNA isoforms cleaved and poly-Adenylated at the proximal pA site. 0 or 100= all mRNA isoforms of a gene use the proximal site or the distal pA site, respectively. High correlation between pPAU values in NEU<sub>WT</sub> and NEU<sub>RTT</sub>. B, most genes show small changes <10% in pPAU in NEU<sub>RTT</sub>. C, sequencing read peaks showing the absence of *MECP2* 3'UTR reads in the NEU<sub>RTT</sub> sample and peaks corresponding to *DICER1* pA sites (arrowheads) as an example of genes with similar pPAU index values in NEU<sub>WT</sub> and NEU<sub>RTT</sub>. D, 3'UTR isoforms also undergo buffering. Data derived from Figures 3H-I (10 biological replicates). Up and low hinges= 25<sup>th</sup> and 75<sup>th</sup> percentiles. Up and low whiskers= 1.5\*IQR above and below the hinges. Notches= 1.58\*IQR/sqrt(n), matching 95% CI for median comparison. E, Pearson's correlation of alternatively-spliced mRNAs in the *Mecp2* y/- mouse shows that canonical CDS and non-protein-coding isoforms undergo buffering. F, quantification of mRNA isoforms stability in WT mice using nuclear or chromatin-associated RNA confirms that nonsense-mediated decay, processed transcripts, and retained-intron mRNAs are less stable than the canonical CDS and alternatively-spliced protein-coding isoforms. This underscores the quality of the mRNA stability calculations based on whole-cell versus nuclear or chromatin-associated mRNA ratios. G-H, ROC and PRC for predicting stability changes based on 3'UTR (G) or CDS (H). I, CDS-specific features random forest predicting stability changes for human and *Mecp2* y/- mouse. Error bars= 95% CI. J, Pearson's correlation shows significant similarities between sequence composition between CDS and 3'UTRs. K, 3'UTR- features random forest predicting stability changes for *Mecp2* y/- mouse based on chromatin-associated RNAs. Error bars= 95% CI. L, sequence features random forest predicting stability changes based on chromatin-associated RNAs in *Mecp2* y/- mouse model, indicating that 3'UTR and CDS contain highly accurate predicting elements for stability changes. Error bars= 95% CI. M-N, ROC and PRC classifier performance for half-life fold-change prediction in *Mecp2* y/- mouse based on nuclear (M) or chromatin-associated RNA (N). TR= transcription rate, HL= half-life, SS= steady-state. Steady-state and half-life= 2 biological replicates; transcription rate= 4 biological replicates. Panels E, F, I, and K were created with [BioRender.com](https://BioRender.com).

*Primer list for qRT-PCRs*

|        |         |                          |
|--------|---------|--------------------------|
| CAV2   | Forward | ATTCTCTTTGCCACCCTCAG     |
|        | Reverse | GTCCTACGCTCGTACACAATG    |
| PI15   | Forward | TCGCAGAATGACATGATCGC     |
|        | Reverse | TGGTCCCAAATGCAAGTAGC     |
| FOXB1  | Forward | CGCGCAACTTGAAGCAAC       |
|        | Reverse | TCAGCGAGATGTACGAGTAGG    |
| DTX3L  | Forward | AAAGGAAATCAGCCAGAGGG     |
|        | Reverse | GGGTATCTCTTTCTGGGTTTG    |
| PHLDA1 | Forward | ACCAAATACCGCACCCAC       |
|        | Reverse | AGAAATGTGCTCGTCCCAC      |
| FOXG1  | Forward | CCTGCCCTGTGAGTCTTTAAG    |
|        | Reverse | GTTCACTTACAGTCTGGTCCC    |
| LHX2   | Forward | GGTCTTCCCTACTACAATGGC    |
|        | Reverse | GTCGTTTTTCGTTGCAGCTTAG   |
| FEZF1  | Forward | CTGTGGCAAAGGGTTTCATC     |
|        | Reverse | TCTTGTCGTTGTGGGTGTG      |
| SIX3   | Forward | CAACCCAGCAAGAAACG        |
|        | Reverse | CTCGGTCCAATGGCCTG        |
| DLK1   | Forward | CGAGGATGACAATGTTTGCAG    |
|        | Reverse | CAGAGTCCGTGAAGGCAG       |
| DCX    | Forward | TATGCGCCGAAGCAAGTCTCCA   |
|        | Reverse | CATCCAAGGACAGAGGCAGGTA   |
| ACTB   | Forward | TGAAGTGTGACGTGGACATC     |
|        | Reverse | GGAGGAGCAATGATCTTGAT     |
| GAPDH  | Forward | CATGAGAAGTATGACAACAGCCT  |
|        | Reverse | AGTCCTTCCACGATACCAAAGT   |
| AGO3   | Forward | TCCTGTTGGGAGGCAAATAACA   |
|        | Reverse | AAGAGTAGTGGTTCTGTCACAGA  |
| FZD3   | Forward | GCTTTGCACTCTGCTCTTGTAG   |
|        | Reverse | TTGTACACTCACAGTTAAAGTGCT |
| NT5DC2 | Forward | CAACCCACCTACTTCTCAAGG    |
|        | Reverse | GTAGAAGGTGAAGTCCACGCG    |
| KIF3A  | Forward | TGAGTAATCAAGGGAAGGGTCG   |
|        | Reverse | AAAACAACCTCCCTTTCTCCAGA  |
| RBL2   | Forward | AAACTTATGACCTCTTCCTTTAGG |
|        | Reverse | TTTTAAACTGCCAGGAACACCC   |
| SKP2   | Forward | GTTGCACAGGAAATGATGATGCT  |
|        | Reverse | AACCCAGCTCTTGTCACTAAT    |
| 18S    | Forward | GATGGGCGGCGGAAAATAG      |
|        | Reverse | GCGTGGATTCTGCATAATGGT    |
